# Supplementary material
Source: PubMed Central journal article supplement (PMC9509481)
Supplement: NIHMS1831965-supplement-1831965_Sup_Tables_Files.pdf [file NIHMS1831965-supplement-1831965_Sup_Tables_Files.pdf]

**Supplementary table 1. *E. coli* strains used in this study**

| Strains | Relevant genetic alterations                                                                   | Genetic backgrounds                                                                                                                                                  | References or Sources |
|---------|------------------------------------------------------------------------------------------------|----------------------------------------------------------------------------------------------------------------------------------------------------------------------|-----------------------|
| S6      | <i>Wild type</i>                                                                               | <i>MG1655</i>                                                                                                                                                        |                       |
| S7      | $\Delta$ <i>dinB</i>                                                                           | $\Delta$ <i>dinB::frt-kan-frt</i>                                                                                                                                    | 1                     |
| S185    | <i>ptet-dinB</i>                                                                               | <i>JEK522</i> $\Delta$ <i>lamB::ptet-dinB-frt-kan-frt</i>                                                                                                            | This study            |
| S315    | <i>dinB</i> <sup>+</sup>                                                                       | <i>dinB::dinB-frt-kan-frt</i>                                                                                                                                        | This study            |
| S380    | <i>ptet-dinB</i>                                                                               | <i>JEK522</i> $\Delta$ <i>dinB::frt-cm-frt</i><br>$\Delta$ <i>lamB::ptet-dinB-frt-kan-frt</i>                                                                        | This study            |
| S383    | <i>ptet-dinB</i> <sup><math>\Delta</math>C6</sup>                                              | <i>JEK522</i> $\Delta$ <i>dinB::frt-cm-frt</i><br>$\Delta$ <i>lamB::ptet-dinB</i> <sup><math>\Delta</math>C6</sup> <i>-frt-kan-frt</i>                               | This study            |
| S385    | <i>ptet-dinB</i> <sup>T120P</sup>                                                              | <i>JEK522</i> $\Delta$ <i>dinB::frt-cm-frt</i><br>$\Delta$ <i>lamB::ptet-dinB</i> <sup>T120P</sup> <i>-frt-kan-frt</i>                                               | This study            |
| S398    | $\Delta$ <i>dinB::frt-cm-frt</i> <i>ptet-flag-mypet</i>                                        | <i>JEK522</i> $\Delta$ <i>dinB::frt-cm-frt</i><br>$\Delta$ <i>lamB::ptet-flag-mypet-frt-kan-frt</i>                                                                  | This study            |
| S490    | $\Delta$ <i>lafU</i>                                                                           | $\Delta$ <i>lafU::frt-kan-frt</i>                                                                                                                                    | This study            |
| S519    | <i>dinBp</i> <sup>lexA</sup> <i>sulAp-gfp-mut2</i>                                             | $\Delta$ <i>attB::sulAp-gfp-mut2-frt-cm-frt</i> $\Delta$ <i>lafU::frt-kan-frt</i><br><i>dinBp</i> <sup>lexA</sup>                                                    | This study            |
| S530    | <i>sulAp-gfp-mut2</i>                                                                          | $\Delta$ <i>attB::sulAp-gfp-mut2-frt-cm-frt</i> $\Delta$ <i>lafU::frt-kan-frt</i>                                                                                    | 1                     |
| S532    | <i>dnaQ</i> (e <sub>L</sub> )                                                                  | $\Delta$ <i>dnaQ::dnaQ</i> (e <sub>L</sub> ) $\Delta$ <i>yafT::frt-cm-frt</i>                                                                                        | 1                     |
| S611    | <i>dinB</i> <sup>T120A</sup>                                                                   | <i>dinB::dinB</i> <sup>T120A</sup> <i>-frt-kan-frt</i>                                                                                                               | This study            |
| S612    | <i>dinB</i> <sup>T120S</sup>                                                                   | <i>dinB::dinB</i> <sup>T120S</sup> <i>-frt-kan-frt</i>                                                                                                               | This study            |
| S613    | <i>dinB</i> <sup>T120V</sup>                                                                   | <i>dinB::dinB</i> <sup>T120V</sup> <i>-frt-kan-frt</i>                                                                                                               | This study            |
| S614    | <i>dinB</i> <sup>T120D</sup>                                                                   | <i>dinB::dinB</i> <sup>T120D</sup> <i>-frt-kan-frt</i>                                                                                                               | This study            |
| S644    | <i>dinB</i> <sup>T120P,Rim, <math>\Delta</math>C6</sup> - <i>PAmCherry</i><br><i>ssb-mypet</i> | $\Delta$ <i>dinB::dinB</i> <sup>T120P,Rim, <math>\Delta</math>C6</sup> <i>-</i><br><i>PAmCherry-frt-kan-frt</i><br>$\Delta$ <i>lacZ::ssb-mypet-frt</i> <i>lexA51</i> | This study            |
| S673    | <i>ptet-flag-polB</i>                                                                          | <i>JEK522</i> $\Delta$ <i>lamB::ptet-flag-polB-frt-kan-frt</i>                                                                                                       | This study            |
| S685    | <i>ptet-flag-recQ</i>                                                                          | <i>JEK522</i> $\Delta$ <i>lamB::ptet-flag-recQ-frt-kan-frt</i>                                                                                                       | This study            |
| S687    | <i>ptet-flag-recQ</i> <sup>WH</sup>                                                            | <i>JEK522</i> $\Delta$ <i>lamB::ptet-flag-recQ</i> <sup>WH</sup> <i>-frt-kan-frt</i>                                                                                 | This study            |
| S742    | <i>sulAp-gfp-mut2</i> $\Delta$ <i>dinB</i>                                                     | $\Delta$ <i>attB::sulAp-gfp-mut2-frt-cm-frt</i> $\Delta$ <i>dinB::frt-kan-frt</i>                                                                                    | 1                     |
| S800    | <i>dinB</i> <sup>T120P</sup>                                                                   | $\Delta$ <i>lafU::frt-kan-frt</i> <i>dinB</i> <sup>T120P</sup>                                                                                                       | This study            |
| S802    | <i>ptet-dinB</i> <sup>1-230</sup>                                                              | <i>JEK522</i> $\Delta$ <i>dinB::frt-cm-frt</i><br><i>ptet-dinB</i> <sup>1-230</sup> <i>-frt-kan-frt</i>                                                              | This study            |
| S804    | <i>ptet-dinB</i> <sup>LF</sup>                                                                 | <i>JEK522</i> $\Delta$ <i>dinB::frt-cm-frt</i><br><i>ptet-dinB</i> <sup>LF</sup> <i>-frt-kan-frt</i>                                                                 | This study            |
| S852    | <i>sulAp-gfp-mut2</i> <i>dinB</i> <sup>T120P</sup>                                             | $\Delta$ <i>attB::sulAp-gfp-mut2-frt-cm-frt</i> $\Delta$ <i>lafU::frt-kan-frt</i><br><i>dinB</i> <sup>T120P</sup>                                                    | This study            |
| S853    | <i>sulAp-gfp-mut2</i> <i>dinBp</i> <sup>lexA</sup><br><i>dinB</i> <sup>T120P</sup>             | $\Delta$ <i>attB::sulAp-gfp-mut2-frt-cm-frt</i> $\Delta$ <i>lafU::frt-kan-frt</i><br><i>dinBp</i> <sup>lexA</sup> <i>dinB</i> <sup>T120P</sup>                       | This study            |

|       |                                                                                                    |                                                                                                                                                                   |            |
|-------|----------------------------------------------------------------------------------------------------|-------------------------------------------------------------------------------------------------------------------------------------------------------------------|------------|
| S929  | <i>recQ<sup>WH</sup>-dinB<sup>LF</sup>-PamCherry</i>                                               | $\Delta$ <i>dinB::recQ<sup>WH</sup>-dinB<sup>LF</sup>-PAmCherry-frt-kan-frt</i>                                                                                   | This study |
| S930  | <i>recQ<sup>WH</sup>-dinB<sup>LF</sup>-PamCherry-flag ssb-mypet</i>                                | $\Delta$ <i>dinB::recQ<sup>WH</sup>-dinB<sup>LF</sup>-PAmCherry-flag-frt-kan-frt lacZ::ssb-mypet-frt lexA51</i>                                                   | This study |
| S937  | <i>pVP135</i>                                                                                      | <i>EVP22b <math>\Delta</math>yafT::frt-cm-frt <math>\Delta</math>lafU::frt pVP135</i>                                                                             | This study |
| S939  | <i>dinB<sup>T120P</sup> pVP135</i>                                                                 | <i>EVP22b <math>\Delta</math>yafT::frt-cm-frt <math>\Delta</math>lafU::frt dinB-T120P pVP135</i>                                                                  | This study |
| S952  | <i>recQ<sup>WH,R503A</sup>-dinB<sup>LF</sup>-PAmCherry</i>                                         | $\Delta$ <i>dinB::recQ<sup>WH,R503A</sup>-dinB<sup>LF</sup>-PAmCherry-frt-kan-frt</i>                                                                             | This study |
| S983  | <i>recQ<sup>WH(R503A)</sup>-dinB<sup>LF</sup> ssb-mypet</i>                                        | $\Delta$ <i>dinB::recQ<sup>WH(R503A)</sup>-dinB<sup>LF</sup>-PAmCherry-frt-kan-frt <math>\Delta</math>lacZ::ssb-mypet-frt lexA51 sulA211</i>                      | This study |
| S984  | <i>recQ<sup>WH</sup>-dinB<sup>LF(Rim, <math>\Delta</math>C6)</sup>-PAmCherry ssb-mypet</i>         | $\Delta$ <i>dinB::recQ<sup>WH</sup>-dinB<sup>LF(Rim, <math>\Delta</math>C6)</sup>-PAmCherry-frt-kan-frt <math>\Delta</math>lacZ::ssb-mypet-frt lexA51 sulA211</i> | This study |
| SU000 | <i>AB1157</i>                                                                                      | <i>AB1157</i>                                                                                                                                                     | 2          |
| IL05  | <i>lacO<sub>250</sub>-kan</i>                                                                      | <i>AB1157 tetO<sub>240</sub>-gm ori1 (@3908 kb) lacO<sub>250</sub>-kan ter2 (@ 1801 kb)</i>                                                                       | 3          |
| S989  | <i>lacO<sub>250</sub>-kan pBAD24-lacI<sup>AC11</sup>-ssb-ct</i>                                    | <i>IL05 pBAD24-lacI<sup>AC11</sup>-ssb-ct</i>                                                                                                                     | This study |
| S990  | <i>lacO<sub>250</sub>-kan pBAD24-lacI<sup>AC11</sup>-ssb-ct<sup>DA, <math>\Delta</math>F</sup></i> | <i>IL05 pBAD24-lacI<sup>AC11</sup>-ssb-ct<sup>DA, <math>\Delta</math>F</sup></i>                                                                                  | This study |
| S1022 | $\Delta$ <i>recQ</i>                                                                               | $\Delta$ <i>recQ::frt-cm-frt</i>                                                                                                                                  | This study |
| S1069 | <i>ptet-flag-recQ<sup>R448A</sup></i>                                                              | <i>JEK522 <math>\Delta</math>lamB::ptet-flag-recQ<sup>R448A</sup>-frt-kan-frt</i>                                                                                 | This study |
| S1071 | <i>ptet-flag-recQ<sup>R503A</sup></i>                                                              | <i>JEK522 <math>\Delta</math>lamB::ptet-flag-recQ<sup>R503A</sup>-frt-kan-frt</i>                                                                                 | This study |
| S1074 | <i>ptet-flag-exol</i>                                                                              | <i>JEK522 <math>\Delta</math>lamB::ptet-flag-exol-frt-kan-frt</i>                                                                                                 | This study |
| S1075 | <i>ptet-flag-topoIII</i>                                                                           | <i>JEK522 <math>\Delta</math>lamB::ptet-flag-topoIII-frt-kan-frt</i>                                                                                              | This study |
| S1088 | <i>ptet-flag-exoI<sup>Q311A</sup></i>                                                              | <i>JEK522 <math>\Delta</math>lamB::ptet-flag-exoI<sup>Q311A</sup>-frt-kan-frt</i>                                                                                 | This study |
| S1089 | <i>ptet-flag-exoI<sup>R316A</sup></i>                                                              | <i>JEK522 <math>\Delta</math>lamB::ptet-flag-exoI<sup>R316A</sup>-frt-kan-frt</i>                                                                                 | This study |
| S1090 | <i>ptet-flag-exoI<sup>R414A</sup></i>                                                              | <i>JEK522 <math>\Delta</math>lamB::ptet-flag-exoI<sup>R414A</sup>-frt-kan-frt</i>                                                                                 | This study |
| S1091 | <i>ptet-flag-polA</i>                                                                              | <i>JEK522 <math>\Delta</math>lamB::ptet-flag-polA-frt-kan-frt</i>                                                                                                 | This study |
| S1093 | <i>polA-recQ<sup>WH</sup></i>                                                                      | <i>polA::polA-recQ<sup>WH</sup>-frt-kan-frt</i>                                                                                                                   | This study |
| S1094 | <i>polA-recQ<sup>WH(R425A, R503A)</sup></i>                                                        | <i>polA::polA-recQ<sup>WH(R425A, R503A)</sup>-frt-kan-frt</i>                                                                                                     | This study |
| S1095 | <i>polA<sup>+</sup></i>                                                                            | <i>polA::polA-frt-kan-frt</i>                                                                                                                                     | This study |
| S1133 | $\Delta$ <i>dinB <math>\Delta</math>recQ</i>                                                       | $\Delta$ <i>dinB::frt-kan-frt <math>\Delta</math>recQ::frt-cm-frt</i>                                                                                             | This study |
| S1158 | <i>recQ<sup>WH</sup>-dinB<sup>LF(Rim, <math>\Delta</math>C6)</sup>-PAmCherry-flag ssb-mypet</i>    | $\Delta$ <i>dinB::recQ<sup>WH</sup>-dinB<sup>LF(Rim, <math>\Delta</math>C6)</sup>-PAmCherry-</i>                                                                  | This study |

|       |                                                                                              |                                                                                                                                |            |
|-------|----------------------------------------------------------------------------------------------|--------------------------------------------------------------------------------------------------------------------------------|------------|
|       |                                                                                              | <i>flag-frt-kan-frt lacZ::ssb-mypet-frt lexA51 sulA211</i>                                                                     |            |
| S1162 | <i>recQ<sup>WH(R503A)</sup>-dinB<sup>LF</sup>-PAmCherry-flag ssb-mypet</i>                   | $\Delta$ <i>dinB::recQ<sup>WH(R503A)</sup>-dinB<sup>LF</sup>-PAmCherry-flag-frt-kan-frt lacZ::ssb-mypet-frt lexA51 sulA211</i> | This study |
| S1168 | <i>dinB<sup>ΔC6</sup></i>                                                                    | $\Delta$ <i>lafU::frt-kan-frt ΔdinB::dinB<sup>ΔC6</sup></i>                                                                    | This study |
| S1171 | <i>dinB<sup>T120P,ΔC6</sup></i>                                                              | $\Delta$ <i>lafU::frt-kan-frt ΔdinB::dinB<sup>T120P,ΔC6</sup></i>                                                              | This study |
| S1177 | <i>ptet-flag-pola-recQ<sup>WH</sup></i>                                                      | <i>JEK522 ΔlamB::ptet-flag-pola-recQ<sup>WH</sup>-frt-kan-frt</i>                                                              | This study |
| S1178 | <i>ptet-flag-pola-recQ<sup>WH(R425A,R503A)</sup></i>                                         | <i>JEK522 ΔlamB::ptet-flag-pola-recQ<sup>WH(R425A,R503A)</sup>-frt-kan-frt</i>                                                 | This study |
| S1179 | <i>ptet-flag-recQ<sup>WH</sup>-dinB<sup>LF(ΔC6)</sup></i>                                    | <i>JEK522 ΔlamB::ptet-flag-recQ<sup>WH</sup>-dinB<sup>LF(ΔC6)</sup>-frt-kan-frt</i>                                            | This study |
| S1205 | <i>dnaQ(e<sub>L</sub>) dinB<sup>T120P</sup></i>                                              | <i>dnaQ::dnaQ(e<sub>L</sub>) ΔyafT::frt-cm-frt ΔlafU::frt-kan-frt dinB<sup>T120P</sup></i>                                     | This study |
| S1252 | <i>hda-recQ<sup>WH</sup></i>                                                                 | <i>hda::hda-recQ<sup>WH</sup>-frt-kan-fr</i>                                                                                   | This study |
| S1253 | <i>hda-recQ<sup>WH(R425A,R503A)</sup></i>                                                    | <i>hda::hda-recQ<sup>WH(R425A,R503A)</sup>-frt-kan-fr</i>                                                                      | This study |
| S1254 | <i>hda<sup>+</sup></i>                                                                       | <i>hda::hda-frt-kan-fr</i>                                                                                                     | This study |
| S1280 | $\Delta$ <i>dinB pola-recQ<sup>WH</sup></i>                                                  | $\Delta$ <i>dinB::frt-cm-frt pola-recQ<sup>WH</sup>-frt-kan-frt</i>                                                            | This study |
| S1281 | $\Delta$ <i>dinB hda-recQ<sup>WH</sup></i>                                                   | $\Delta$ <i>dinB::frt-cm-frt hda-recQ<sup>WH</sup>-frt-kan-frt</i>                                                             | This study |
| S1295 | <i>ptet-crfc</i>                                                                             | <i>JEK522 ΔlamB::ptet-crfc-frt-kan-frt</i>                                                                                     | This study |
| S1317 | <i>ptet-crfc-recQ<sup>WH</sup></i>                                                           | <i>JEK522 ΔlamB::ptet-crfc-recQ<sup>WH</sup>-frt-kan-frt</i>                                                                   | This study |
| S1318 | <i>ptet-crfc-recQ<sup>WH(R425A,R503A)</sup></i>                                              | <i>JEK522 ΔlamB::ptet-crfc-recQ<sup>WH(R425A,R503A)</sup>-frt-kan-frt</i>                                                      | This study |
| S1359 | <i>pola-recQ-WH-PAmCherry-flag-frt-kan-frt</i>                                               | <i>pola::pola-recQ-WH-PAmCherry-flag-frt-kan-frt ΔlacZ::ssb-mypet-frt lexA51 sulA211</i>                                       | This study |
| S1361 | <i>pola-recQ-WH-R503A-PAmCherry-flag-frt-kan-frt</i>                                         | <i>pola::pola-recQ-WH-R503A-PAmCherry-flag-frt-kan-frt ΔlacZ::ssb-mypet-frt lexA51 sulA211</i>                                 | This study |
| S1501 | <i>lacO<sub>250</sub>-kan pBAD24-lacI<sup>ΔC11</sup>-ssb<sup>DL</sup>-ct</i>                 | <i>IL05 pBAD24-lacI<sup>ΔC11</sup>-ssb<sup>DL</sup>-ct</i>                                                                     | This study |
| S1515 | <i>lacO<sub>250</sub>-kan pBAD24-lacI</i>                                                    | <i>IL05 pBAD24-lacI</i>                                                                                                        | This study |
| S1526 | <i>sulAp-gfp-mut2-frt-cm-frt lacO<sub>250</sub>-kan</i>                                      | $\Delta$ <i>attB::sulAp-gfp-mut2-frt-cm-frt lacO<sub>250</sub>-kan</i>                                                         | This study |
| S1532 | <i>lacO<sub>250</sub>-kan pBAD24-lacI<sup>ΔC11</sup>-ssb<sup>DL</sup>-ct<sup>DA,ΔF</sup></i> | <i>IL05 pBAD24-lacI<sup>ΔC11</sup>-ssb<sup>DL</sup>-ct<sup>DA,ΔF</sup></i>                                                     | This study |
| S1539 | $\Delta$ <i>dinB</i>                                                                         | <i>AB1157 ΔdinB::frt-cm-frt</i>                                                                                                | This study |
| S1549 | $\Delta$ <i>dinB lacO<sub>250</sub>-kan</i>                                                  | <i>IL05 ΔdinB::frt-cm-frt</i>                                                                                                  | This study |
| S1552 | <i>lacO<sub>250</sub>-kan pBAD24</i>                                                         | <i>IL05 pBAD24</i>                                                                                                             | This study |
| S1555 | $\Delta$ <i>dinB lacO<sub>250</sub>-kan pBAD24</i>                                           | <i>IL05 ΔdinB::frt-cm-frt pBAD24</i>                                                                                           | This study |

|        |                                                                                           |                                                                                                  |            |
|--------|-------------------------------------------------------------------------------------------|--------------------------------------------------------------------------------------------------|------------|
| S1557  | <i>pBAD24-lacI<sup>ΔC11</sup>-ssb-ct</i>                                                  | AB1157                                                                                           | This study |
| S1605  | <i>sulAp-gfp-mut2-frt-cm-frt lacO<sup>250</sup>-kan pBAD24-lacI<sup>ΔC11</sup>-ssb-ct</i> | <i>ΔattB::sulAp-gfp-mut2-frt-cm-frt lacO<sup>250</sup>-kan pBAD24-lacI<sup>ΔC11</sup>-ssb-ct</i> | This study |
| S1608  | <i>ΔdinB lacO<sup>250</sup>-kan pBAD24-lacI<sup>ΔC11</sup>-ssb-ct</i>                     | IL05 <i>ΔdinB::frt-cm-frt pBAD24-lacI<sup>ΔC11</sup>-ssb-ct</i>                                  | This study |
| S1609  | <i>ΔattB::sulAp-gfp-mut2-frt</i>                                                          | <i>ΔlafU::frt ΔattB::sulAp-gfp-mut2-frt</i>                                                      | This study |
| S1610  | <i>ΔdinB ΔattB::sulAp-gfp-mut2-frt</i>                                                    | <i>ΔdinB::frt ΔattB::sulAp-gfp-mut2-frt</i>                                                      | This study |
| S1611  | <i>dinB<sup>T120</sup></i>                                                                | <i>ΔlafU::frt dinB<sup>T120</sup> ΔattB::sulAp-gfp-mut2-frt</i>                                  | This study |
| S1612  | <i>dinBp-lexA-mut3 dinB<sup>+</sup></i>                                                   | <i>ΔlafU::frt dinBp-lexA-mut3 dinB<sup>+</sup> ΔattB::sulAp-gfp-mut2-frt</i>                     | This study |
| S1613  | <i>dinBp-lexA-mut3 dinB<sup>T120</sup></i>                                                | <i>ΔlafU::frt dinBp-lexA-mut3 dinB<sup>T120</sup> ΔattB::sulAp-gfp-mut2-frt</i>                  | This study |
| S1620  | <i>lacO<sub>250</sub>-kan pBAD24-lacI<sup>ΔC11</sup></i>                                  | AB1157 <i>lacO<sub>250</sub>-kan pBAD24-lacI<sup>ΔC11</sup></i>                                  | This study |
| S1633  | <i>dinB<sup>T120</sup></i>                                                                | <i>ΔlafU::frt dinB<sup>T120</sup></i>                                                            | This study |
| S1634  | <i>dinB<sup>ΔC6</sup></i>                                                                 | <i>ΔlafU::frt dinB<sup>ΔC6</sup></i>                                                             | This study |
| S1635  | <i>dinB<sup>T120P,ΔC6</sup></i>                                                           | <i>ΔlafU::frt dinB<sup>T120P,ΔC6</sup></i>                                                       | This study |
| EVP22b | <i>ΔuvrA ΔmutS pVP135</i>                                                                 | FBG151 <i>ΔuvrA::frt ΔmutS::frt pVP135</i>                                                       | 4,5        |
| EVP23b | <i>ΔuvrA ΔmutS pVP135</i>                                                                 | FBG152 <i>ΔuvrA::frt ΔΔmutS::frt pVP135</i>                                                      | 4,5        |
| EVP886 | <i>ΔdinB pVP135</i>                                                                       | EVP22b <i>ΔdinB::frt pVP135</i>                                                                  | This study |
| EVP887 | <i>ΔdinB pVP135</i>                                                                       | EVP23b <i>ΔdinB::frt pVP135</i>                                                                  | This study |
| S1106  | <i>pVP135</i>                                                                             | EVP22b <i>ΔlafU::FRT pVP135</i>                                                                  | This study |
| S1107  | <i>dinB<sup>T120P</sup> pVP135</i>                                                        | EVP22b <i>ΔlafU::FRT dinB<sup>T120P</sup> pVP135</i>                                             | This study |
| EVP957 | <i>dinB<sup>T120P</sup> pVP135</i>                                                        | EVP23b <i>ΔlafU::FRT dinB<sup>T120P</sup> pVP135</i>                                             | This study |
| EVP392 | <i>ΔumuDC ΔpolB ΔdinB pVP135</i>                                                          | EVP22b <i>ΔumuDC::frt polB::frt dinB::frt pVP135</i>                                             | This study |
| EVP415 | <i>ΔumuDC ΔpolB ΔdinB pVP135</i>                                                          | EVP23b <i>ΔumuDC::frt ΔpolB::frt ΔdinB::frt pVP135</i>                                           | This study |
| JEK458 | <i>ΔdinB</i>                                                                              | <i>ΔdinB::frt</i>                                                                                | This study |
| JEK515 | <i>ΔattB::(lacI tetR)</i>                                                                 | MG1655 <i>rph<sup>+</sup> DE(lacZYA) ΔattB::(lacI tetR)(Z2)</i>                                  | 6          |
| JEK522 | <i>ΔattB::(lacI tetR)</i>                                                                 | MG1655 <i>ΔattB::(lacI tetR)(Z2)</i>                                                             | This study |
| JEK687 | <i>ptet-flag-mypet</i>                                                                    | JEK522 <i>ΔlamB::ptet-flag-mypet-frt-kan-frt</i>                                                 | This study |
| JEK762 | <i>ssb-mypet</i>                                                                          | <i>ΔlacZ::ssb-mypet-frt lexA51 sulA211</i>                                                       | 7          |
| JEK766 | <i>dinB-PAmCherry ssb-mypet</i>                                                           | <i>ΔdinB::dinB-PAmCherry-frt-kan-frt ΔlacZ::ssb-mypet-frt lexA51 sulA211</i>                     | 7          |
| JEK781 | <i>dinB-PAmCherry-flag ssb-mypet</i>                                                      | <i>ΔdinB::dinB-PAmCherry-flag-frt-kan-frt ΔlacZ::ssb-mypet-frt lexA51 sulA211</i>                | 7          |

|              |                                                      |                                                                                                                           |            |
|--------------|------------------------------------------------------|---------------------------------------------------------------------------------------------------------------------------|------------|
| JEK790       | <i>dinB<sup>Rim,ΔC6</sup>-PAmCherry ssb-mypet</i>    | $\Delta$ <i>dinB::dinB<sup>Rim, ΔC6</sup>-PAmCherry-frt-kan-frt</i><br>$\Delta$ <i>lacZ::ssb-mypet-frt lexA51 sulA211</i> | 7          |
| ET215        | <i>dinB<sup>T120P</sup>-PAmCherry</i>                | $\Delta$ <i>dinB::dinB<sup>T120P</sup>-PAmCherry-frt-kan-frt</i>                                                          | This study |
| ET216        | <i>dinB<sup>T120P</sup>-PAmCherry-flag</i>           | $\Delta$ <i>dinB::dinB<sup>T120P</sup>-PAmCherry-flag-frt-kan-frt</i>                                                     | This study |
| ET227        | <i>dinB<sup>T120P</sup>-PAmCherry ssb-mypet</i>      | <i>dinB::dinB<sup>T120P</sup>-PAmCherry-frt-kan-frt</i> $\Delta$ <i>lacZ::ssb-mypet-frt lexA51 sulA211</i>                | This study |
| ET230        | <i>dinB<sup>T120P</sup>-PAmCherry-flag ssb-mypet</i> | <i>dinB::dinB<sup>T120P</sup>-PAmCherry-flag-frt-kan-frt</i> $\Delta$ <i>lacZ::ssb-mypet-frt lexA51 sulA211</i>           | This study |
| SU001/RRL361 | <i>polA-PAmCherry-frt-kan-frt</i>                    | AB1157 <i>polA-PAmCherry-frt-kan-frt</i>                                                                                  | 2          |
| ET242        | <i>polA-PAmCherry-frt-kan-frt</i>                    | <i>polA::polA-PAmCherry-frt-kan-frt</i> $\Delta$ <i>lacZ::ssb-mypet-frt lexA51 sulA211</i>                                | This study |

**Supplementary table 2. Plasmids used in this study**

| Plasmids                                                             | Relevant inserts                                                                     | References or Sources |
|----------------------------------------------------------------------|--------------------------------------------------------------------------------------|-----------------------|
| pVP135                                                               | Expression of phage lambda integrase/excisionase                                     | 4                     |
| pVP146                                                               | Internal control for transformation efficiency                                       | 4                     |
| pAP1                                                                 | Parental plasmid for construction of N <sup>2</sup> -furfuryl dG-containing plasmid  | This study            |
| pGP22                                                                | Parental plasmid for construction of N <sup>2</sup> -furfuryl dG-containing plasmid  | This study            |
| pBAD24                                                               | Arabinose-inducible expression plasmid                                               | Commercial            |
| pBAD24-lacI                                                          | Expression plasmid for LacI                                                          | This study            |
| pBAD24-lacI <sup>ΔC11</sup>                                          | Expression plasmid for LacI <sup>ΔC11</sup>                                          | This study            |
| pBAD24-lacI <sup>ΔC11</sup> -ssb-ct                                  | Expression plasmid for LacI <sup>ΔC11</sup> -SSB-Ct                                  | This study            |
| pBAD24-lacI <sup>ΔC11</sup> -ssb <sup>IDL</sup> -ct                  | Expression plasmid for LacI <sup>ΔC11</sup> -SSB <sup>IDL</sup> -Ct                  | This study            |
| pBAD24-lacI <sup>ΔC11</sup> -ssb-ct <sup>DA,ΔF</sup>                 | Expression plasmid for LacI <sup>ΔC11</sup> -SSB-Ct <sup>DA,ΔF</sup>                 | This study            |
| pBAD24-lacI <sup>ΔC11</sup> -ssb <sup>IDL</sup> -ct <sup>DA,ΔF</sup> | Expression plasmid for LacI <sup>ΔC11</sup> -SSB <sup>IDL</sup> -Ct <sup>DA,ΔF</sup> | This study            |

## References

1. Chang, S. *et al.* A gatekeeping function of the replicative polymerase controls pathway choice in the resolution of lesion-stalled replisomes. *Proc. Natl. Acad. Sci. U.S.A.* **116**, 25591–25601 (2019).

2. Uphoff, S., Reyes-Lamothe, R., Garza de Leon, F., Sherratt, D. J. & Kapanidis, A. N. Single-molecule DNA repair in live bacteria. **110**, 8063–8068 (2013).
3. Lau, I. F. *et al.* Spatial and temporal organization of replicating Escherichia coli chromosomes. *Mol. Microbiol.* **49**, 731–743 (2003).
4. Pagès, V., Mazón, G., Naiman, K., Philippin, G. & Fuchs, R. P. Monitoring bypass of single replication-blocking lesions by damage avoidance in the Escherichia coli chromosome. *Nucleic Acids Res.* **40**, 9036–9043 (2012).
5. Esnault, E., Valens, M., Espéli, O. & Boccard, F. Chromosome structuring limits genome plasticity in Escherichia coli. *PLoS Genet.* **3**, e226 (2007).
6. Lutz, R. & Bujard, H. Independent and tight regulation of transcriptional units in Escherichia coli via the LacR/O, the TetR/O and AraC/I1-I2 regulatory elements. *Nucleic Acids Res.* **25**, 1203–1210 (1997).
7. Thrall, E. S., Kath, J. E., Chang, S. & Loparo, J. J. Single-molecule imaging reveals multiple pathways for the recruitment of translesion polymerases after DNA damage. *Nat Commun* **8**, 2170 (2017).
